# Supplementary material
Source: ML conference proceedings conference paper supplement (https://proceedings.mlr.press/v108/saad20a.html)
Supplement: Supplementary file 1 [file saad20a-supp.pdf]

## A PROOFS

This appendix contains the proofs of the theorems from Section 3, which are adapted from Saad et al. (2020, Section 3) and included here for completeness.

**Proposition A.1** (Proposition 3.1 in main text). *For integers  $k$  and  $l$  with  $0 \leq l \leq k$ , define  $Z_{kl} := 2^k - 2^l \mathbf{1}_{l < k}$ . Then*

$$\mathbb{B}_{kl} = \left\{ \frac{0}{Z_{kl}}, \frac{1}{Z_{kl}}, \dots, \frac{Z_{kl} - 1}{Z_{kl}}, \frac{Z_{kl}}{Z_{kl}} \mathbf{1}_{l < k} \right\}.$$

*Proof.* For  $l = k$ , the number system  $\mathbb{B}_{kl} = \mathbb{B}_{kk}$  is the set of dyadic rationals less than one with denominator  $Z_{kk} = 2^k$ . For  $0 \leq l < k$ , any  $x \in \mathbb{B}_{kl}$  when written in base 2 has a (possibly empty) non-repeating prefix and a non-empty infinitely repeating suffix, so that  $x$  has binary expansion  $(0.b_1 \dots b_l \overline{s_{l+1} \dots s_k})_2$ . Now,

$$2^l (0.b_1 \dots b_l)_2 = (b_1 \dots b_l)_2 = \sum_{i=0}^{l-1} b_{l-i} 2^i$$

and

$$\begin{aligned} (2^{k-l} - 1)(0.\overline{s_{l+1} \dots s_k})_2 &= (s_{l+1} \dots s_k)_2 \\ &= \sum_{i=0}^{k-(l+1)} s_{k-i} 2^i \end{aligned}$$

together imply that

$$\begin{aligned} x &= (0.b_1 \dots b_l)_2 + 2^{-l} (0.\overline{s_{l+1} \dots s_k})_2 \\ &= \frac{(2^{k-l} - 1) \sum_{i=0}^{l-1} b_{l-i} 2^i + \sum_{i=0}^{k-(l+1)} s_{k-i} 2^i}{2^k - 2^l}. \quad \square \end{aligned}$$

*Remark A.2.* When  $0 \leq l \leq k$ , we have  $\mathbb{B}_{kl} \subseteq \mathbb{B}_{k+1, l+1}$ , since if  $x \in \mathbb{B}_{kl}$  then Proposition A.1 furnishes an integer  $c$  such that  $x = c/(2^k - 2^l \mathbf{1}_{l < k}) = 2c/(2^{k+1} - 2^{l+1} \mathbf{1}_{l < k}) \in \mathbb{B}_{k+1, l+1}$ . Further, for  $k \geq 2$ , we have  $\mathbb{B}_{k, k-1} \setminus \{1\} = \mathbb{B}_{k-1, k-1} \subseteq \mathbb{B}_{kk}$ , since any repeating suffix with exactly one digit can be folded into the prefix (except when the prefix and suffix are all ones).

**Theorem A.3** (Theorem 3.2 in main text). *Let  $T$  be an entropy-optimal DDG tree with a non-degenerate output distribution  $(p_i)_{i=1}^n$  for  $n > 1$ . The depth of  $T$  is the smallest integer  $k$  such that there exists an integer  $l \in \{0, \dots, k\}$  for which all the  $p_i$  are integer multiples of  $1/Z_{kl}$  (hence in  $\mathbb{B}_{kl}$ ).*

*Proof.* Suppose that  $T$  is an entropy-optimal DDG tree and let  $k$  be its depth (note that  $k \geq 1$ , as  $k = 0$  implies  $p$  is degenerate). Assume  $n = 2$ . From Theorem 2.1, for each  $i = 1, 2$ , the probability  $p_i$  is a rational number where the number of digits in the shortest prefix and suffix of the binary expansion (which ends

in  $\bar{0}$  if dyadic) is at most  $k$ . Therefore, we can express the probabilities  $p_1, p_2$  in terms of their binary expansions as

$$\begin{aligned} p_1 &= (0.b_1 \dots b_{l_1} \overline{s_{l_1+1} \dots s_k})_2, \\ p_2 &= (0.w_1 \dots w_{l_2} \overline{u_{l_2+1} \dots u_k})_2, \end{aligned}$$

where  $l_i$  and  $k - l_i$  are the number of digits in the shortest prefix and suffix, respectively, of the binary expansions of each  $p_i$ .

If  $l_1 = l_2$  then the conclusion follows from Proposition A.1. If  $l_1 = k - 1$  and  $l_2 = k$  then the conclusion follows from Remark A.2 and the fact that  $p_1 \neq 1$ ,  $p_2 \neq 1$ . Now, from Proposition A.1, it suffices to establish that  $l_1 = l_2 =: l$ , so that  $p_1$  and  $p_2$  are both integer multiples of  $1/Z_{kl}$ . Suppose for a contradiction that  $l_1 < l_2$  and  $l_1 \neq k - 1$ . Write  $p_1 = a/c$  and  $p_2 = b/d$  where each summand is in reduced form. By Proposition A.1, we have  $c = 2^k - 2^{l_1}$  and  $d = 2^k - 2^{l_2} \mathbf{1}_{l_2 < k}$ . Then as  $p_1 + p_2 = 1$  we have  $ad + bc = cd$ . If  $c \neq d$  then either  $b$  has a positive factor in common with  $d$  or  $a$  with  $c$ , contradicting the summands being in reduced form. But  $c = d$  contradicts  $l_1 < l_2$ .

The case where  $n > 2$  is a straightforward extension of this argument.  $\square$

**Theorem A.4** (Theorem 3.4 in main text). *Suppose  $p$  is defined by  $p_i = a_i/m$  ( $i = 1, \dots, n$ ), where  $\sum_{i=1}^n a_i = m$ . The depth of any entropy-optimal sampler for  $p$  is at most  $m - 1$ .*

*Proof.* By Theorem 3.2, it suffices to find integers  $k \leq m - 1$  and  $l \leq k$  such that  $Z_{kl}$  is a multiple of  $m$ , which in turn implies that any entropy-optimal sampler for  $p$  has a maximum depth of  $m - 1$ .

Case 1:  $Z$  is odd. Consider  $k = m - 1$ . We will show that  $m$  divides  $2^{m-1} - 2^l$  for some  $l$  such  $0 \leq l \leq m - 2$ . Let  $\phi$  be Euler's totient function, which satisfies  $1 \leq \phi(m) \leq m - 1 = k$ . Then  $2^{\phi(m)} \equiv 1 \pmod{m}$  as  $\gcd(m, 2) = 1$ . Put  $l = m - 1 - \phi(m)$  and conclude that  $m$  divides  $2^{m-1} - 2^{m-1-\phi(m)}$ .

Case 2:  $m$  is even. Let  $t \geq 1$  be the maximal power of 2 dividing  $m$ , and write  $m = m' 2^t$ . Consider  $k = m' - 1 + t$  and  $l = j + t$  where  $j = (m' - 1) - \phi(m')$ . As in the previous case applied to  $m'$ , we have that  $m'$  divides  $2^{m'-1} - 2^j$ , and so  $m$  divides  $2^k - 2^l$ . We have  $0 \leq l \leq k$  as  $1 \leq \phi(m) \leq m - 1$ . Finally,  $k = m' + t - 1 \leq m' 2^t - 1 = m - 1$  as  $t < 2^t$ .  $\square$

**Theorem A.5** (Theorem 3.5 in main text). *Let  $p$  be as in Theorem A.4. If  $m$  is prime and 2 is a primitive root modulo  $m$ , then the depth of an entropy-optimal DDG tree for  $p$  is  $m - 1$ .*

*Proof.* Since 2 is a primitive root modulo  $m$ , the smallest integer  $a$  for which  $2^a - 1 \equiv 0 \pmod{m}$  is precisely  $\phi(m) = m - 1$ . We will show that for any  $k' < m - 1$  there is no exact entropy-optimal sampler that uses  $k'$  bits of precision. By Theorem A.4, if there were such a sampler, then  $Z_{k'l}$  must be a multiple of  $m$  for some  $l \leq k'$ . If  $l < k'$ , then  $Z_{k'l} = 2^{k'} - 2^l$ . Hence  $2^{k'} \equiv 2^l \pmod{m}$  and so  $2^{k'-l} \equiv 1 \pmod{m}$  as  $m$  is odd. But  $k' < m - 1 = \phi(m)$ , contradicting the assumption that 2 is a primitive root modulo  $m$ . If  $l = k'$ , then  $Z_{k'l} = 2^{k'}$ , which is not divisible by  $m$  since we have assumed that  $m$  is odd (as 2 is not a primitive root modulo 2).  $\square$
